# Supplementary material
Source: Springer Nature journal article supplement (https://www.springermedizin.de/resource/supplementary/12875_2010_512_MOESM2_ESM.pdf/9434768)
Supplement: MOESM2 [file 9434768]

## Evidence for Sore Throat / Pharyngitis / Tonsillitis

Patients offered a delayed or non-prescribing strategy:

Experience a marginally longer duration of sore throat of less than 1 day compared to patients who are prescribed antibiotics (Little et al., 1997).

Experience marginally more symptoms (less than 1%) of sore throat, headache, and fever compared to patients who are prescribed antibiotics (Del Mar et al., 2006).

Are less likely to re-consult compared to those prescribed antibiotics. (Little et al., 1997).

Are less likely to believe antibiotics are effective (Little et al., 1997).
